# Supplementary material for: A Novel Targeted and High‐Efficiency Nanosystem for Combinational Therapy for Alzheimer's Disease
Source: PubMed Central journal article supplement (PMC7539195; doi:10.1002/advs.201902906), 2020-08-09
Supplement: ADVS-7-1902906-s001.pdf [file ADVS-7-1902906-s001.pdf]

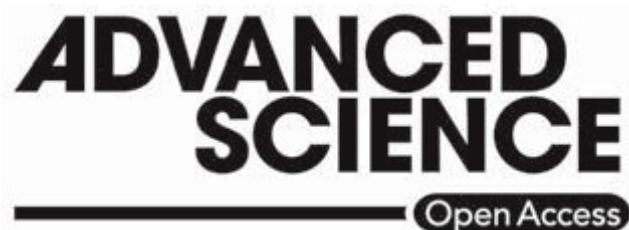

## Supporting Information

for *Adv. Sci.*, DOI: 10.1002/adv.201902906

A Novel Targeted and High-Efficiency Nanosystem for  
Combinational Therapy for Alzheimer's Disease

*Han Yang, Weihang Mu, Daohe Wei, Yue Zhang, Yue  
Duan, Jun-xiao Gao, Xiao-qun Gong, Han-jie Wang,  
Xiao-li Wu,\* Huaying Tao,\* and Jin Chang\**

## Supporting Information

### A Novel Targeted and High Efficiency Nanosystem for Combinational Therapy of Alzheimer's Disease

Han Yang<sup>†,‡</sup>, Weihang Mu<sup>‡,‡</sup>, Jun-xiao Gao<sup>†</sup>, Daohe Wei<sup>†</sup>, Yue Duan<sup>†</sup>, Yue zhang<sup>†</sup>,  
Xiao-qun Gong<sup>†</sup>, Han-jie Wang<sup>†</sup>, Xiao-li Wu<sup>†\*</sup>, Huaying Tao<sup>§\*</sup>, Jin Chang<sup>†\*</sup>

<sup>†</sup> School of Life Sciences, Tianjin University, 92 Weijin Road, Nankai District, Tianjin 300072, P.R. China

<sup>‡</sup> Tianjin Children's Hospital, 238 Longyan Road, Beichen District, Tianjin 300072, P.R. China

<sup>§</sup> Department of Nerology, Tianjin Medical University General Hospital, 154 Anshan Road, Heping District, Tianjin 300072, P.R. China

\* Corresponding author Xiao-li Wu, E-mail address: wuxiaoli@tju.edu.cn  
Corresponding author Huaying tao, E-mail address: taohuaying@126.com  
Corresponding author Jin Chang, E-mail address: [jinchang@tju.edu.cn](mailto:jinchang@tju.edu.cn)

# These authors contributed equally to this work.

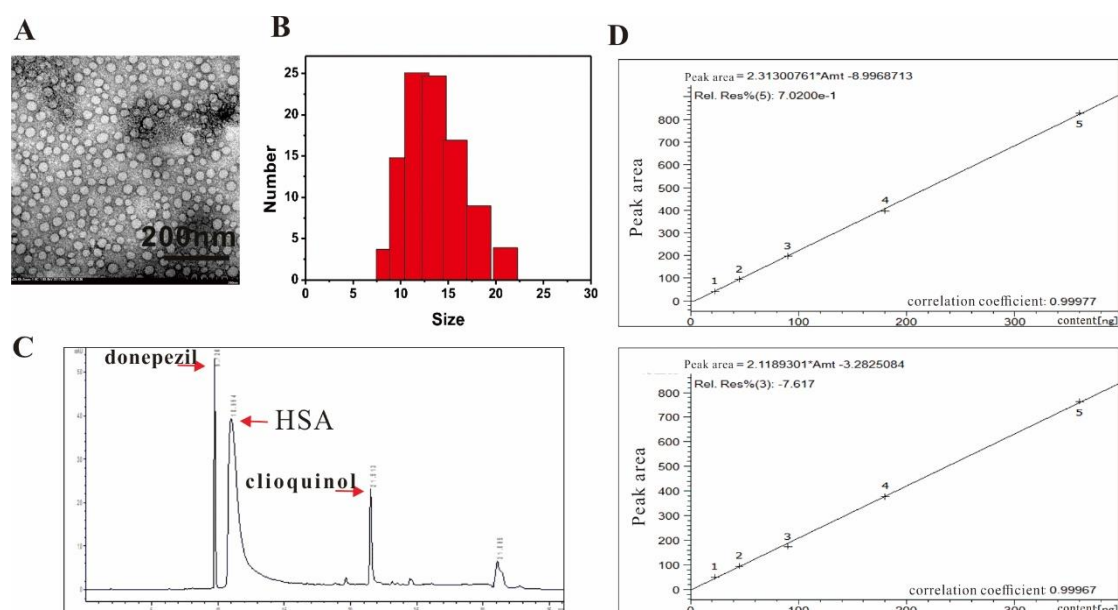

**Figure S1.** (A) TEM images of dCHG NPs (scale bar: 200 nm); and (B) DLS

measurement of dcHG NPs; (C) Absorption spectrum of dcHGT NPs measured by HPLC; (D) Standard curve of donepezil and clioquinol measured by HPLC.

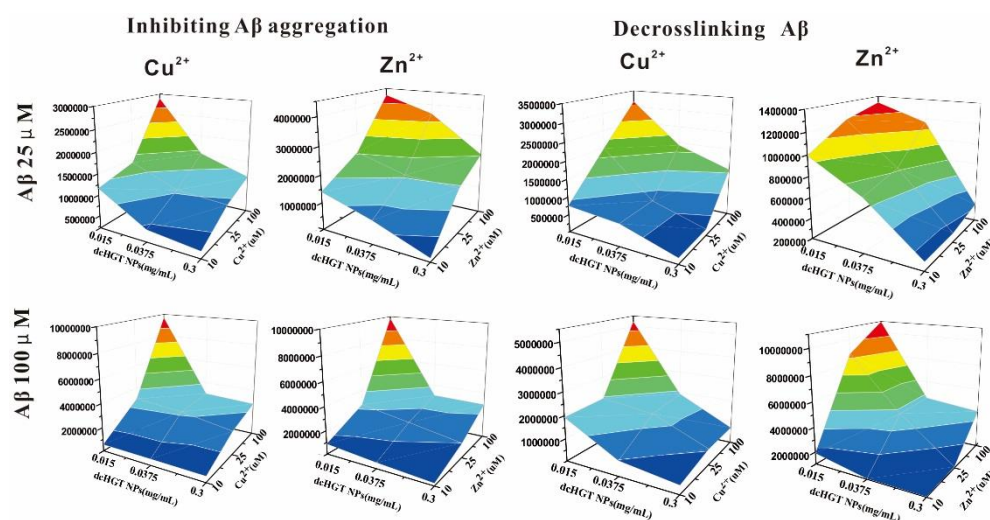

**Figure S2.** 3D color map surface of fluorescence signals in inhibition and disaggregation experiments ( $[A\beta] = 25,100 \mu\text{M}$ ,  $[\text{metal ions}] = 10\text{-}100 \mu\text{M}$ , and  $[\text{dcHGT NPs}] = 0.015\text{-}0.15 \text{mg/mL}$ ). Data are presented as the mean  $\pm$  SD.

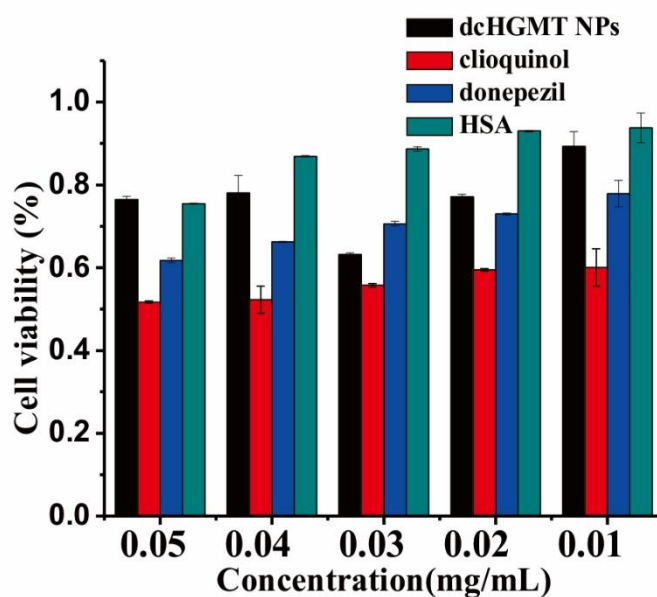

**Figure S3.** Cell viability of BV-2 cells incubated with free donepezil, clioquinol, HSA and dcHGT NPs at various concentrations. Data are presented as the mean  $\pm$  SD.

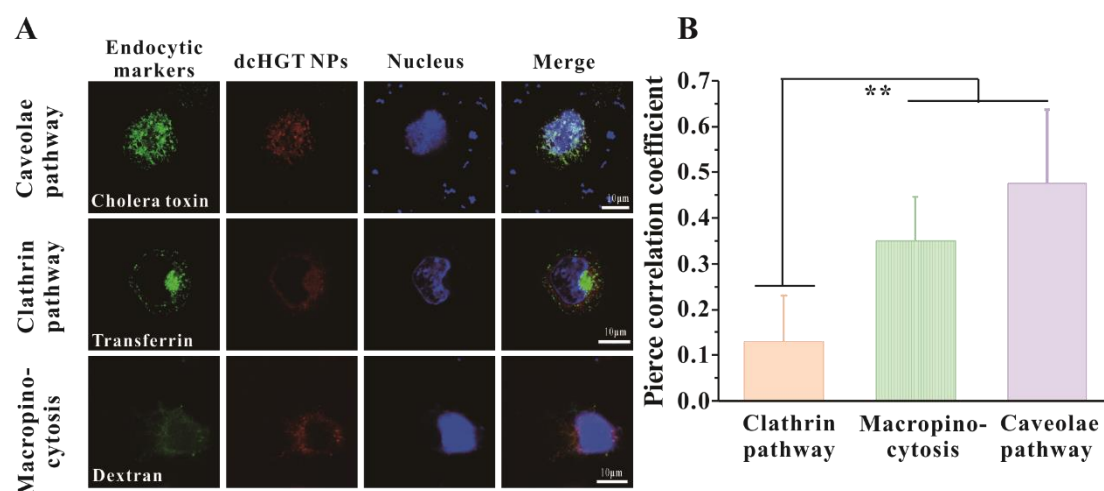

**Figure S4.** Cellular uptake of dcHGT NPs in BV2. (A) Representative images showing the co-localization of dye-labeled dcHGT NPs with endocytic markers by confocal microscopy. The nuclei were stained with Hoechst 33258 (blue). Scar bar, 10  $\mu$ m. (B) Pearson's correlation coefficient analysis of the co-localization between dcHGT NPs and endocytosis markers in BV2. The quantitative data were obtained through Image J software. Data were expressed as mean  $\pm$  SD (n = 6).  $**P < 0.01$ .

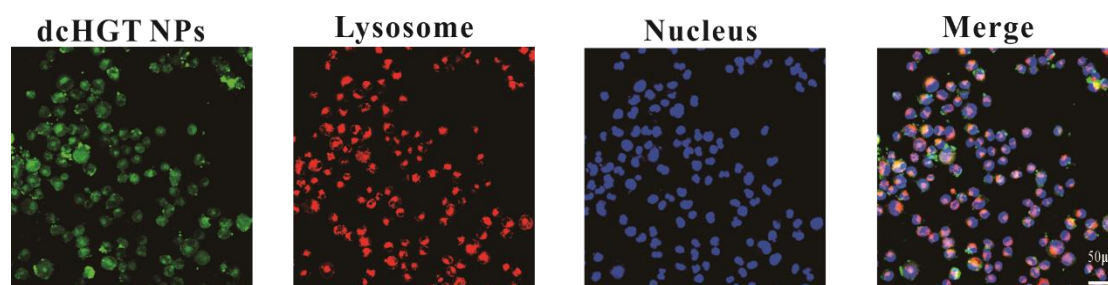

**Figure S5.** Colocalization (yellow) between dcHGT NPs (green) and LysoTracker (red), the indicator of lysosome, after 4 h incubation in BV2. Scar bar, 5  $\mu$ m.

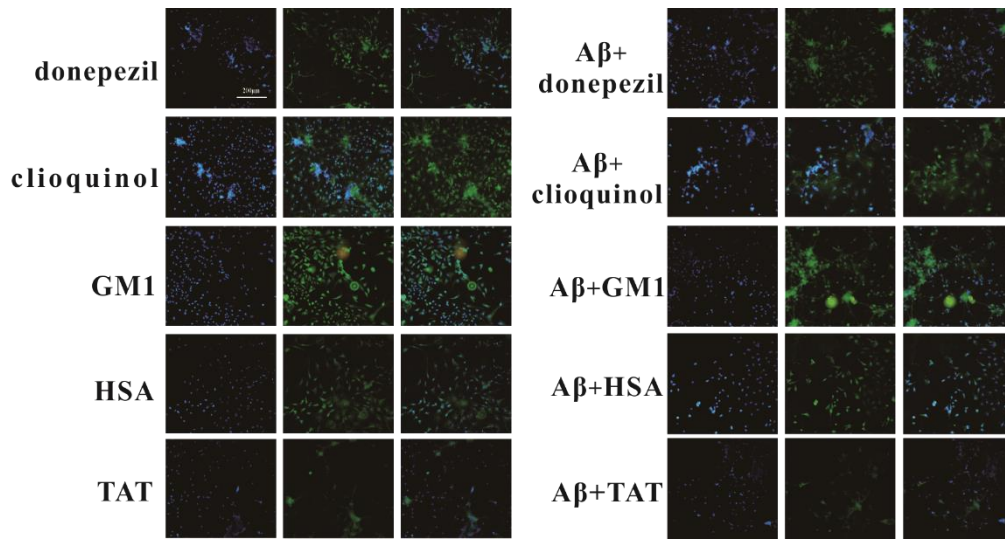

**Figure S6.** Fluorescent morphology images of the primary neurons captured by HCS;

Scale bar: 200  $\mu\text{m}$ .

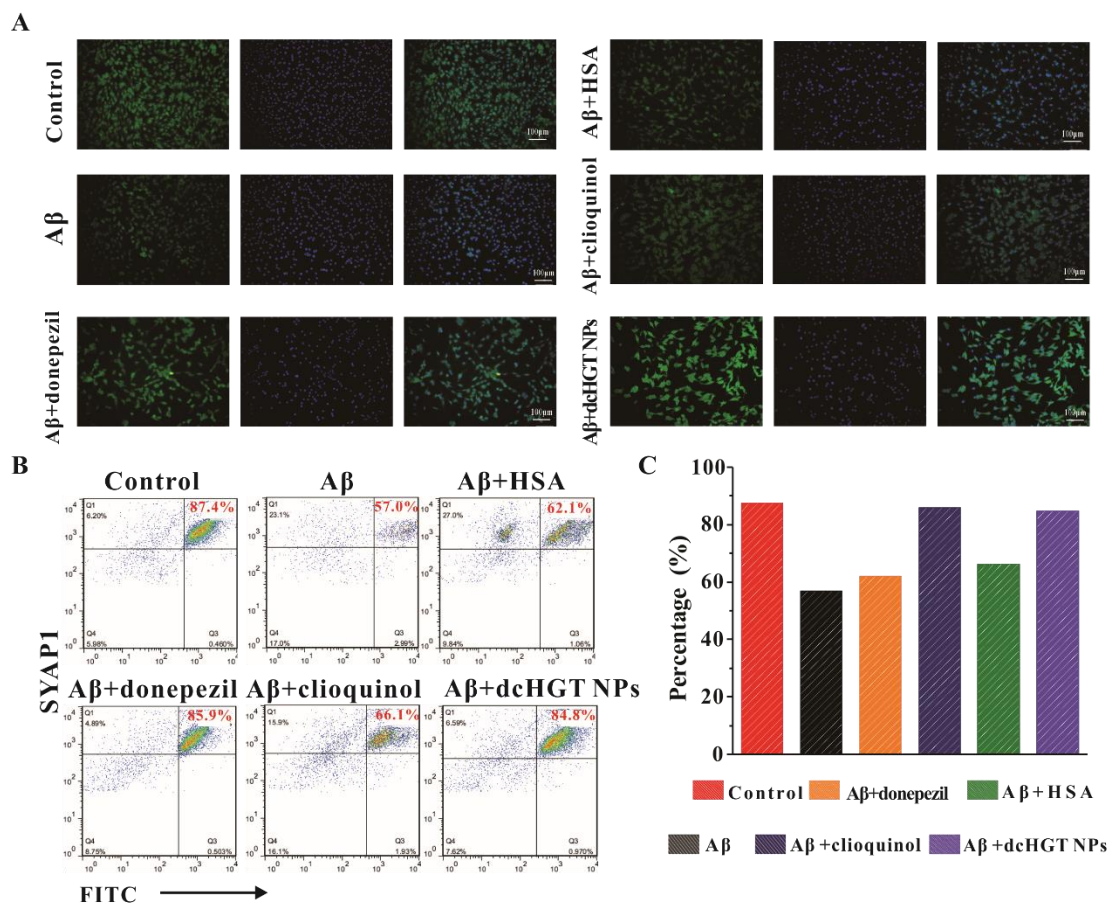

**Figure S7.** Immunofluorescence (A) and flow cytometry (B) were performed to



identify the expression of synaptophysin (SYAP1) in PC12. (C) Statistical analysis of SYAP1 of PC12 in control, A $\beta$ , A $\beta$ +HSA, A $\beta$ +donepezil, A $\beta$ +clioquinol and A $\beta$ +dcHGT NP groups.

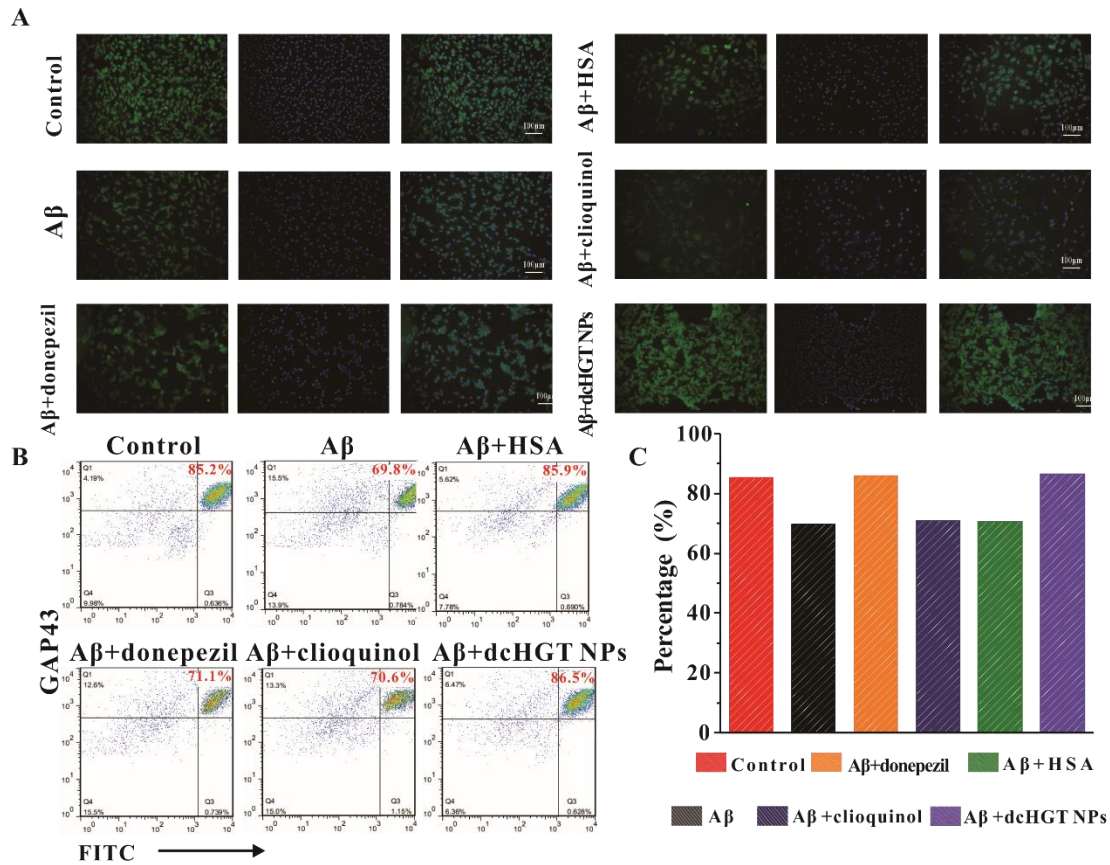

**Figure S8.** Immunofluorescence (A) and flow cytometry (B) were performed to identify the expression of growth-related protein 43 (GAP43) in PC12. (C) Statistical analysis of GAP43 of PC12 in control, A $\beta$ , A $\beta$ +HSA, A $\beta$ +donepezil, A $\beta$ +clioquinol and A $\beta$ +dcHGT NP groups.

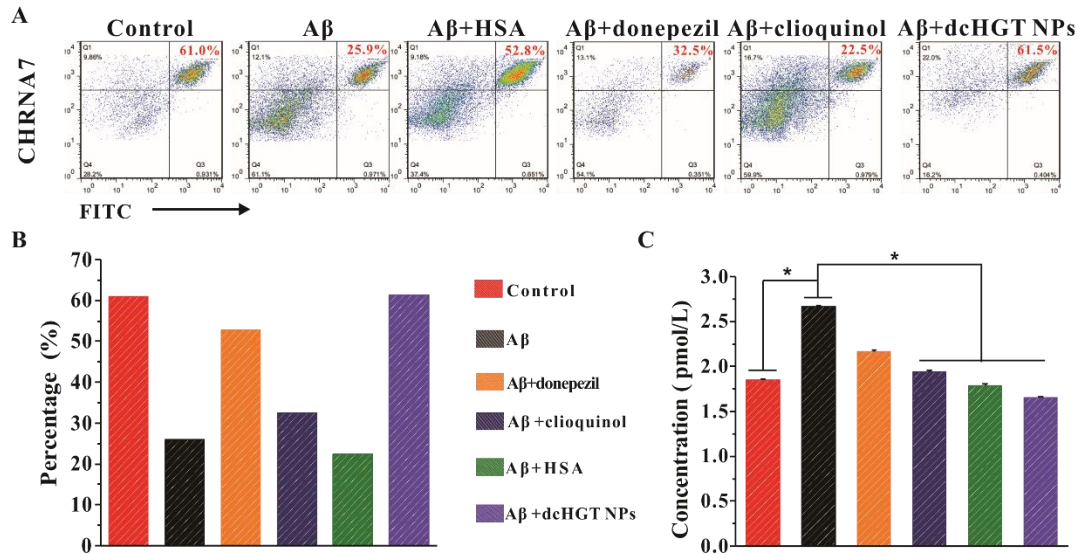

**Figure S9.** (A) Flow cytometry were performed to identificate the expression of neurotype 7 nicotine receptors (CHRNA7) in PC12. (B) Statistical analysis of CHRNA7 of PC12 in control, A $\beta$ , A $\beta$ +HSA, A $\beta$ +donepezil, A $\beta$ +clioquinol and A $\beta$ +dcHGT NP groups. (C) Statistical analysis of the expression of caspase 3 in different groups by ELISA analysis. Data are presented as the mean  $\pm$  SD. \* $P < 0.05$ .

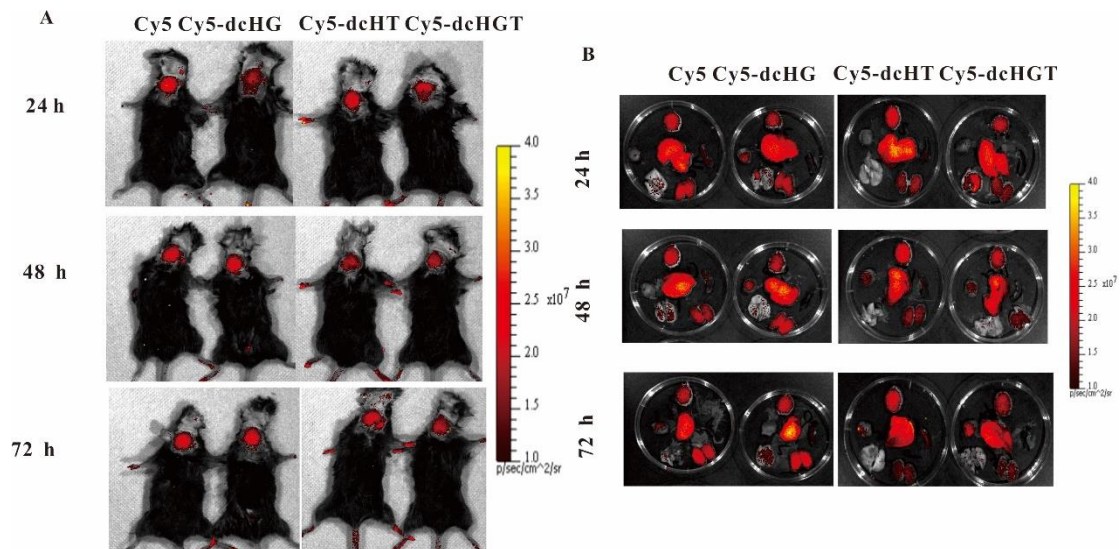

**Figure S10.** (A) In vivo fluorecence imaging at 24h, 48h and 72h after nasal administration of Cy5, Cy5- dcHG NPs, Cy5- dcHT NPs and Cy5- dcHGT NPs; (B) Ex vivo fluorecence images of brain and other tissues at 24h, 48h and 72h after

administration.

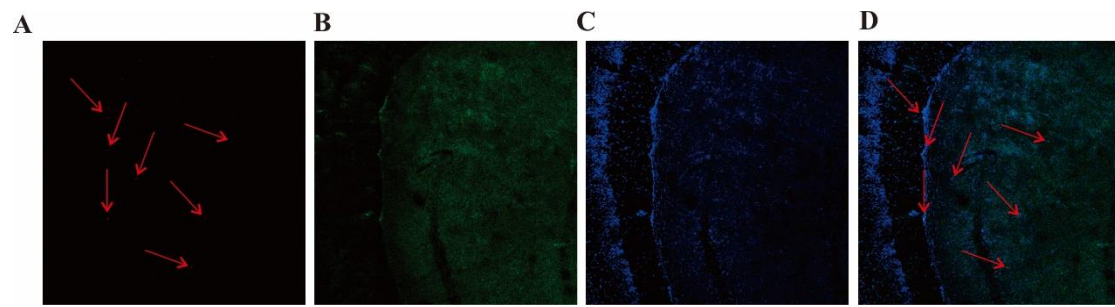

**Figure S11.** Fluorescence imaging of brain slices at 96h after nasal administration with Cy5-dcHGT NPs; (A) Cy5-dcHGT NPs, (B) immunofluorescent primary neurons, (C) DAPI, (D) merge images.
